# Supplementary material for: Periodic Acid Modification of Chemical‐Bath Deposited SnO2 Electron Transport Layers for Perovskite Solar Cells and Mini Modules
Source: PubMed Central journal article supplement (PMC10369290; doi:10.1002/advs.202300010), 2023-05-04
Supplement: ADVS-10-2300010-s001.pdf [file ADVS-10-2300010-s001.pdf]

## Supporting Information

for *Adv. Sci.*, DOI 10.1002/adv.202300010

Periodic Acid Modification of Chemical-Bath Deposited SnO<sub>2</sub> Electron Transport Layers for Perovskite Solar Cells and Mini Modules

*Ziyi Wu, Jiazheng Su, Nianyao Chai, Siyang Cheng, Xuanyu Wang, Ziling Zhang, Xuanling Liu, Han Zhong, Jianfei Yang, Zhiping Wang, Jianbo Liu, Xin Li\* and Hong Lin\**

# Periodic Acid Modification of Chemical-bath Deposited SnO<sub>2</sub> Electron Transport Layers for Perovskite Solar Cells and Mini Modules

Ziyi Wu<sup>1</sup>, Jiazheng Su<sup>1</sup>, Nianyao Chai<sup>2</sup>, Siyang Cheng<sup>3,4,5,6</sup>, Xuanyu Wang<sup>1</sup>, Ziling Zhang<sup>1</sup>, Xuanling Liu<sup>1</sup>, Han Zhong<sup>1</sup>, Jianfei Yang<sup>1</sup>, Zhiping Wang<sup>3,4,5,6</sup>, Jianbo Liu<sup>7</sup>, Xin Li<sup>8,\*</sup>, Hong Lin<sup>1,\*</sup>

1 State Key Laboratory of New Ceramics and Fine Processing, School of Materials Science and Engineering, Tsinghua University, Beijing 100084, P.R. China

2 State Key Laboratory of Advanced Technology for Materials Synthesis and Processing, International School of Materials Science and Engineering, Wuhan University of Technology, Wuhan 430070, P.R. China

3 Key Lab of Artificial Micro- and Nano-Structures of Ministry of Education of China School of Physics and Technology, Wuhan University, Wuhan 430072, P.R. China

4 Hubei LuoJia Laboratory, Wuhan 430072, P.R. China

5 Wuhan Institute of Quantum Technology, Wuhan 430206, P.R. China.

6 School of Microelectronics, Wuhan University, Wuhan 430072, P.R. China.

7 Key Laboratory of Advanced Materials of Ministry of Education of China, School of Materials Science and Engineering, Tsinghua University, Beijing 100084, P.R. China

8 School of Electronic Science and Engineering, Xiamen University, Xiamen 361005, P.R. China

\* Corresponding author: [lixin01@xmu.edu.cn](mailto:lixin01@xmu.edu.cn) and [hong-lin@tsinghua.edu.cn](mailto:hong-lin@tsinghua.edu.cn)

## Materials

All the chemical reagents were directly used without further purification. Cesium iodide (99.999%), lead bromide (PbBr<sub>2</sub>, 99.999%), Tin(II) chloride dihydrate (>99.995%), N,N-Dimethylformamide (DMF, anhydrous, 99.8%), dimethyl sulfoxide (DMSO, anhydrous, >99.9%), chlorobenzene (anhydrous, 99.8%), acetonitrile (anhydrous, 99.8%), bis(trifluoromethane) sulfonamide lithium salt (Li-TFSL, 99.95%), and 4-*tert*-butyl pyridine (t-BP, 98%), urea (99.0-100.5%) were purchased from Sigma-Aldrich. Formamidinium iodide (FAI, >99.99%) and methylammonium

iodide (MAI, >99.99%) were purchased from Greatcell Solar. Lead iodide (PbI<sub>2</sub>, 99.99%), and thioglycolic acid (>95.0%) were purchased from Tokyo Chemical Industry (TCI). Periodic acid (99%) was purchased from Macklin. Hydrochloric acid (HCl), ethanol, and 2-propanol were purchased from Beijing TongGuang Fine Chemicals Company. FTO glass (12-14 Ohm/□) was purchased from Advanced Election Technology Co., Ltd. Methylamine chloride (MACl, 99.5%) was purchased from Xi'an Polymer Light Technology Co., Ltd. Spiro-OMeTAD (99.5%) and FK209 Co(III) TFSI salt (>99%) were purchased from Lumtec.

### ***Preparation of SnO<sub>2</sub> layer by chemical bathing deposition (CBD)***

The CBD solution was prepared by dissolving 0.5 g urea in 40 mL deionized water, followed by the addition of 10 μL thioglycolic acid and 500 μL HCl (37 wt%). After sonication for 5 minutes, 0.11 g SnCl<sub>2</sub>·2H<sub>2</sub>O (99.995%) was dissolved in the CBD solution. The solution was stored at 8~10 °C for 72 h before use. 20 mL CBD solution was diluted with 100 mL de-ionized water, followed by sonication for 5 minutes. The temperature during the sonication process needs to be carefully controlled below 30 °C to prevent the occurrence of the chemical reaction.

FTO glasses were etched and cleaned in detergent, deionized water, acetone, ethanol, and 2-propanol. Before use, the substrates were dried with N<sub>2</sub> and exposed to an O<sub>2</sub> plasma atmosphere for more than 20 min. As-cleaned FTO glasses were horizontally placed in the CBD solution, followed by a heating process at 70 °C for 4 h. The FTO glasses were cleaned with deionized water 3~4 times. For the PAPT-modified samples, the FTO glasses were immersed in periodic acid solutions with different concentrations varied from 1 mM to 4 mM for 5 minutes. All the FTO glasses were dried with N<sub>2</sub> and annealed on a hot plate at 150 °C for 40 minutes.

### ***Fabrication of perovskite solar cells***

1.45M perovskite precursor solution (CsI: FAI: MAI: PbI<sub>2</sub>: PbBr<sub>2</sub>: MACl=0.05: 0.81: 0.04: 0.98: 0.02: 0.20) were dissolved in DMF: DMSO=4: 1 solvent, as previously reported.<sup>[1]</sup> The precursor solution was spin-coated on the FTO substrate with a SnO<sub>2</sub> layer at 1000 rpm for 12 s and 5000 rpm for 28s. 160 μL chlorobenzene was dropped at 10s before the end of the second spinning process, followed by

annealing at 100 °C for 10 min and 150 °C for 10 min. The Spiro-OMeTAD solution was prepared by dissolving 0.1260 g Spiro-OMeTAD, 32  $\mu$ L Li-TFSI solution (520 mg/mL in acetonitrile), 14  $\mu$ L Co-TFSI (375 mg/mL in acetonitrile), 55  $\mu$ L t-BP in 1.4 mL chlorobenzene. The spiro-OMeTAD solution was spin-coated on the perovskite film at 4000 rpm for 30 s. Finally, a 70 nm thick gold electrode was deposited by thermal evaporation.

***Fabrication of perovskite solar modules (PSMs) via slot-die coating:***

For the fabrication of PSMs, FTO substrates with areas of  $3\times 3$  cm<sup>2</sup> were first etched with a 1024-nm CO<sub>2</sub> laser (P1 scribing). Then, the SnO<sub>2</sub> films were fabricated by the CBD method. The slot-die machine was purchased from DaZheng (Jiangsu) Micro-Nano Tech. Co., Ltd. (China). Then, the perovskite precursor ink was diluted to a molar concentration of 0.8 M and slot-die coated on the substrates accompanied by a gas-quenching process (with a substrate-moving speed of 2 mm/s). The blowing gas pressure from the gas knife was 0.1 MPa. After that, the substrate was transferred onto a hot plate and annealed at 150 °C for 10 mins. Then, the Spiro-OMeTAD solution was slot-die coated at a speed of 2 mm/s. P2-scribe was conducted using a 532-nm-laser. Then, the P2-scribed substrate was evaporated with a mixed top electrode of MoO<sub>x</sub> (5 nm)/ copper (100 nm). Afterward, the module was scribed again to complete the series connection using the same laser scriber. The ratio of the dead-area width to the active-area width was 1:9 (0.05mm to 0.45 mm), leading to a GFF of 90%.

***Computational methods***

First-principle calculations were performed with the density functional theory (DFT) as implemented in Vienna ab-initio Simulation Package (VASP) package.<sup>[2]</sup> The augmented wave (PAW) method<sup>[3, 4]</sup> was used for the interactions between ions and valence electrons with Perdew-Burke-Ernzerhof (PBE)<sup>[5, 6]</sup> functional. The plane wave energy cutoff was set to 450 eV. A sufficiently large vacuum layer of 15 Å was used to avoid the periodic image interactions along the z-direction. The atomic force and energy convergence criteria thresholds were set to 0.02 eV and  $1\times 10^{-5}$  eV/ Å, respectively. The k-point mesh of  $3\times 3\times 1$  was employed for SnO<sub>2</sub> surface geometric

optimization and adsorption energy calculation. The van der Waals (vdW) interaction was taken into account with the Grimme type at the DFT-D3 level.<sup>[7]</sup>

### ***Characterization***

The morphology of the perovskite films was observed by field-emission scanning electron microscopy (FESEM, LEO1530, Zeiss, Germany) and atomic force microscopy (AFM, Cypher, Oxford Instruments, UK). The crystal structures were characterized by X-ray diffraction (XRD, D8 Advance Diffractometer, Bruker, Germany) with Cu K $\alpha$  (1.5406 Å) radiation operating at 40 kV. The Ultraviolet-Visible light spectrum was obtained using a UV-Vis spectrophotometer (Lambda 1050, Perkin Elmer, USA). The photoluminescence (PL) spectra were characterized by a fluorescence spectrometry (FLS920, Edinburgh Instruments, UK). For steady-state PL spectra, the spectra were obtained by illuminating the sample with a monochromatic xenon lamp source ( $\lambda_{exc}$ =460 nm). For time-resolved PL (TRPL), the spectra were acquired with samples photoexcited by a pulsed laser beam (405 nm). The XPS spectra were recorded by an X-ray photoelectron spectrometer (ESCALAB 250Xi, Thermo Fisher SCIENTIFIC INC., UK) with Al K $\alpha$  radiation ( $h\nu = 1486.6$  eV) as the illumination source. The photoelectron spectroscopy in the air (PESA) was performed with the AC-2 instrument (AC-2, RIKEN Instruments, Japan). The Fourier transform infrared spectroscopy (FTIR) measurements were performed on the infrared spectrometer (VERTEX 70V, Bruker, Germany) in ATR (Attenuated Total Reflection) mode. The photocurrent density-voltage ( $J$ - $V$ ) curves were obtained by a digital source meter (2400, Keithley Instruments, USA). The perovskite solar cells were illuminated under AM 1.5G (100 mW/cm<sup>2</sup>) by solar simulators (91192 and 94082A, Newport, USA) calibrated with a standard crystalline silicon solar cell. The monochromatic incident photon-to-electron conversion efficiency (IPCE) spectra were obtained by the quantum efficiency system (QEX10, PV measurements, USA) in a DC mode.

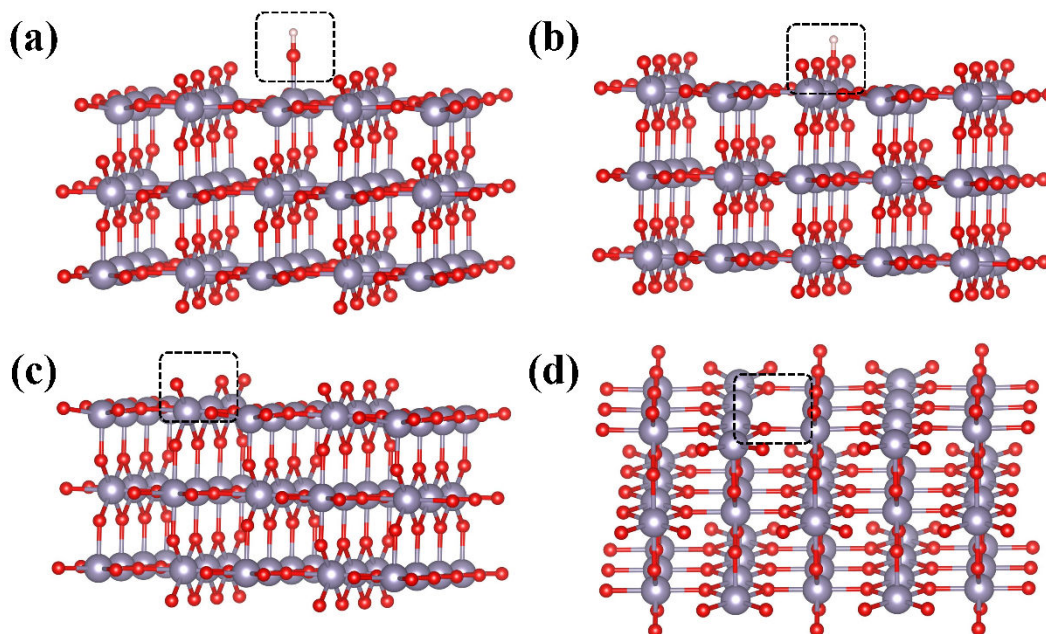

**Figure S1** The structure image of four kinds of oxygen defects on the surface of CBD-coated SnO<sub>2</sub> films: (a) terminal hydroxyl (b) bridge hydroxyl (c) bridge-oxygen vacancy (d) deep oxygen vacancy.

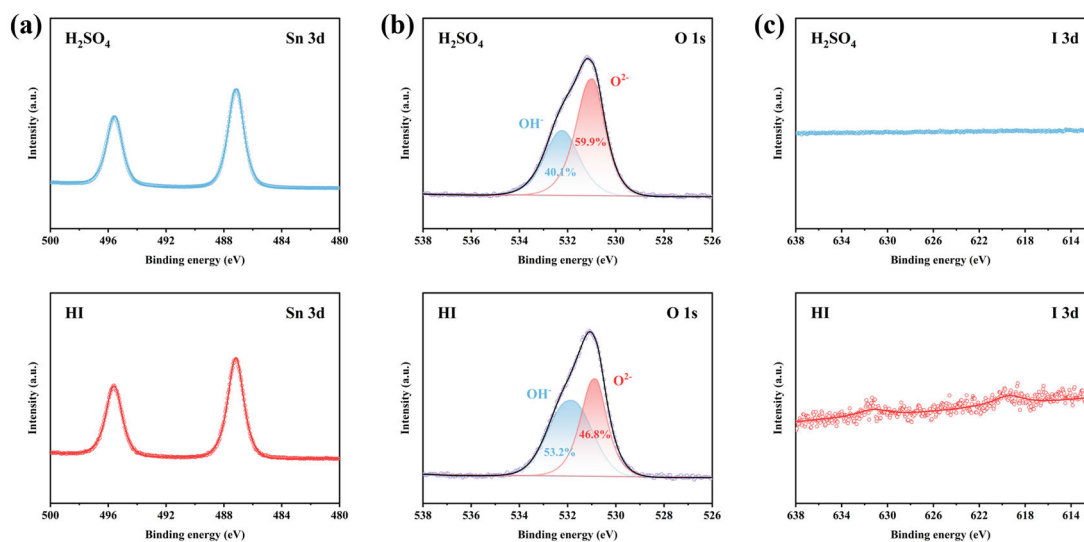

**Figure S2** XPS spectra of SnO<sub>2</sub> films treated with H<sub>2</sub>SO<sub>4</sub> and HI: (a) Sn 3d (b) O 1s (c) I 3d

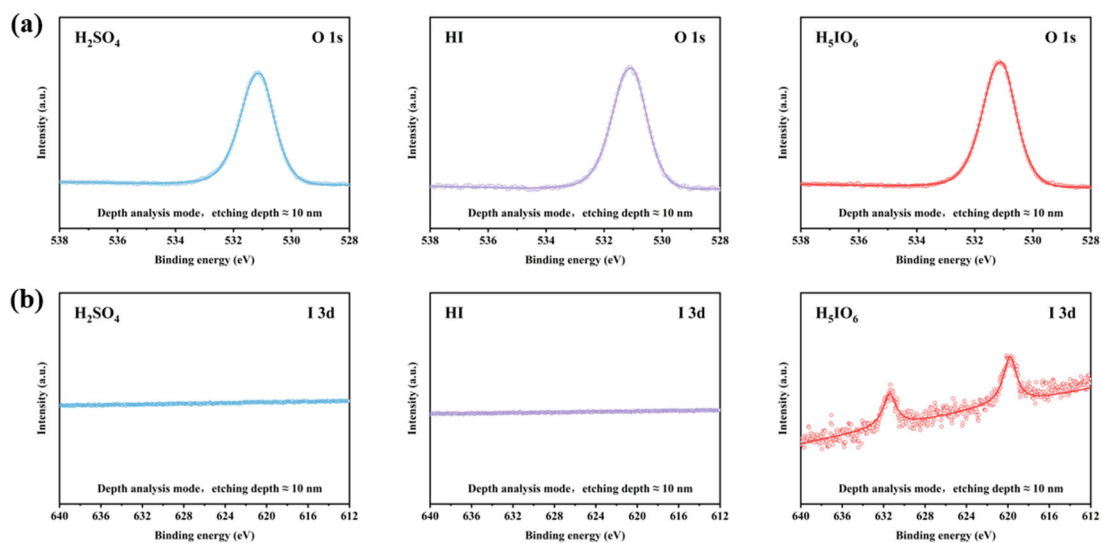

**Figure S3** XPS spectra on depth analysis mode of  $\text{SnO}_2$  films treated by several acids. (a) Sn 3d (b) I 3d

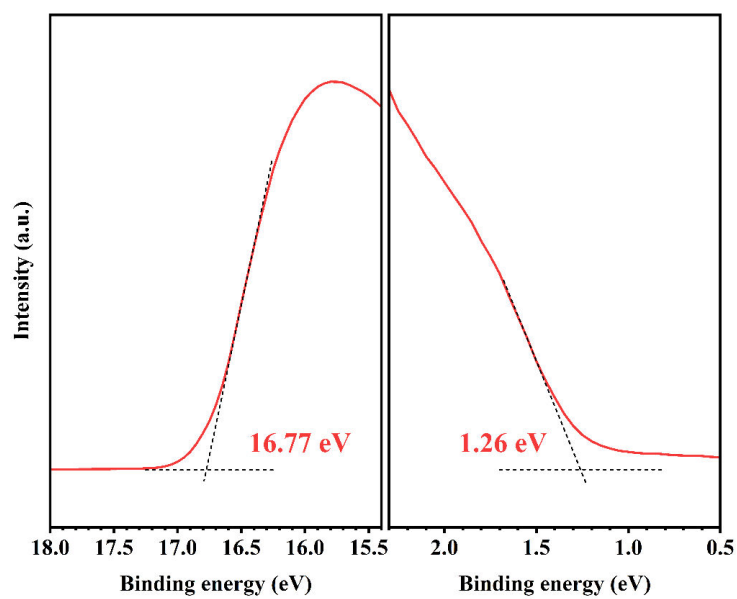

**Figure S4** UPS spectrum of the corresponding perovskite film.

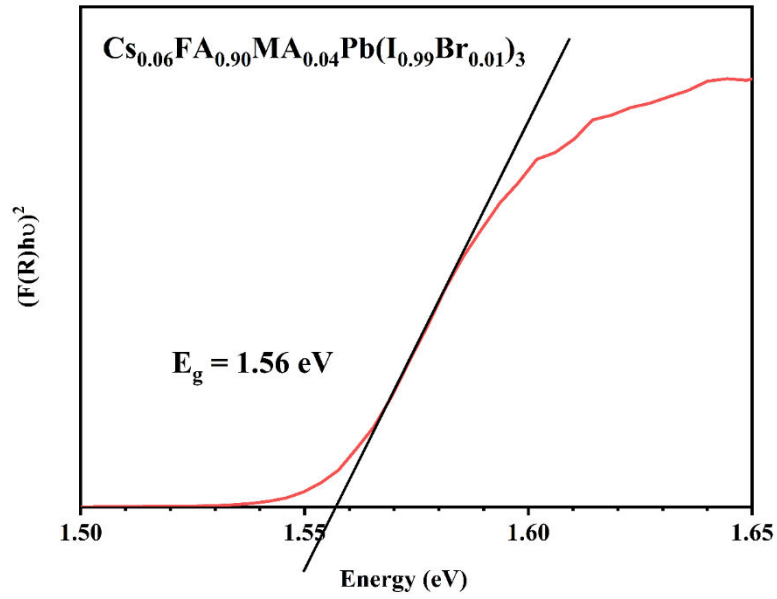

**Figure S5** Optical bandgap calculated by Tauc plot of the perovskite films.

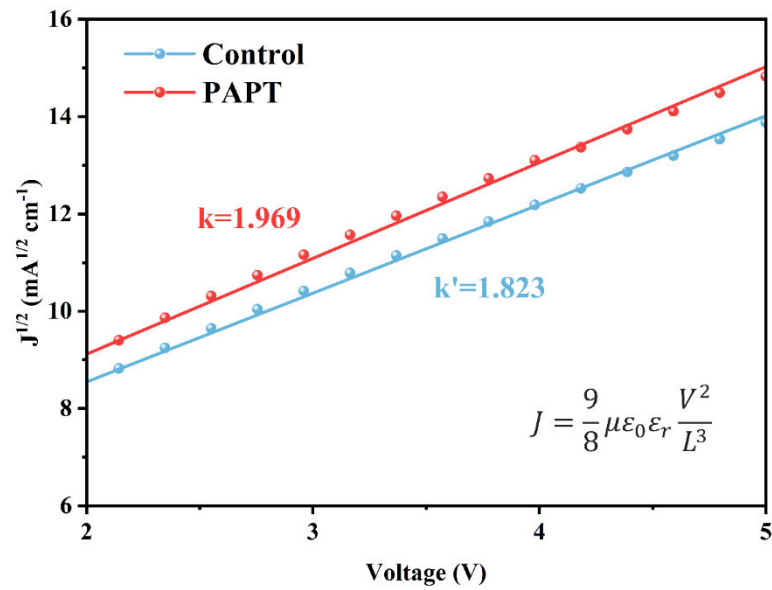

**Figure S6** Mott-Gurney curves ( $J^{1/2}$ - $V$ ) for the calculation of electron mobility in pristine SnO<sub>2</sub> and PAPT-modified SnO<sub>2</sub> layer based on a device structure of FTO/ETL/Ag.

The electron mobility can be calculated by Mott-Gurney Law:

$$J = \frac{9}{8} \mu \epsilon_0 \epsilon_r \frac{V^2}{L^3}$$

Where  $\mu$  is free carrier mobility,  $\epsilon_0$  is permittivity of free space,  $\epsilon_r$  is the dielectric



constant of the material,  $V$  is the applied voltage and  $L$  is the distance between electrodes.<sup>[8]</sup>

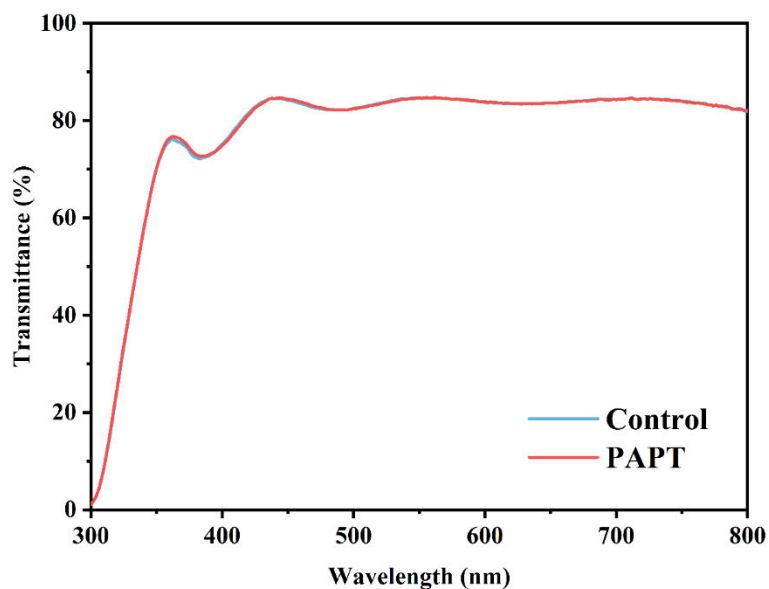

**Figure S7** Transmittance spectra of control and PAPT-modified SnO<sub>2</sub> films.

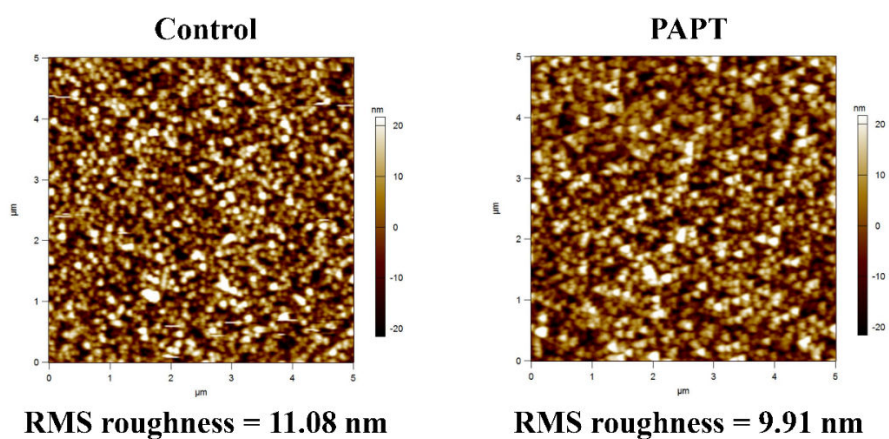

**Figure S8** AFM images of pristine SnO<sub>2</sub> films and PAPT-modified SnO<sub>2</sub> films.

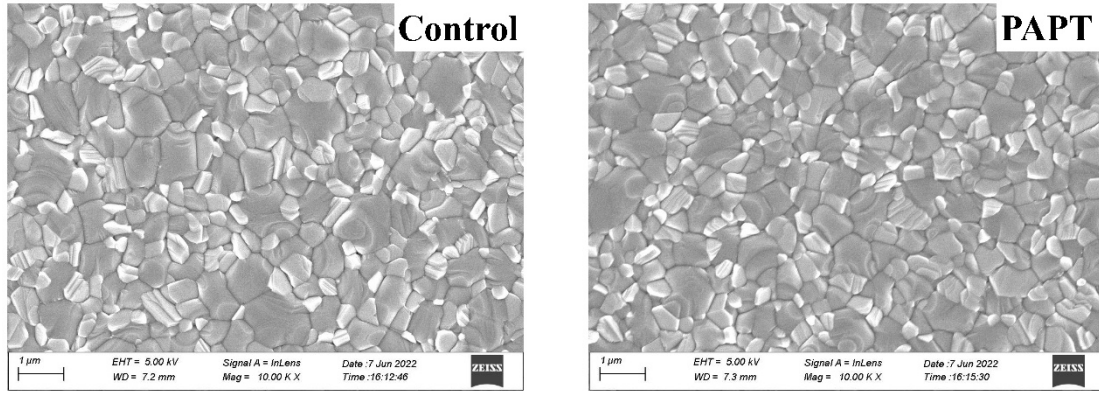

**Figure S9** SEM image of perovskite films on control and PAPT-modified SnO<sub>2</sub> films.

**Table S1** Fitting parameters of the bi-exponential decay function in TRPL spectra of the corresponding perovskite films deposited on the FTO/SnO<sub>2</sub> substrate using a 460 nm excitation light source.

| Samples                        | <i>A1</i> | $\tau_1$ (ns) | <i>A2</i> | $\tau_2$ (ns) | $\tau_{avg}$ (ns) |
|--------------------------------|-----------|---------------|-----------|---------------|-------------------|
| Control SnO <sub>2</sub>       | 0.48      | 12.42         | 0.52      | 146.92        | 82.70             |
| PAPT-modified SnO <sub>2</sub> | 0.64      | 6.30          | 0.36      | 128.91        | 50.55             |

The average carrier lifetime ( $\tau_{avg}$ ) was calculated according to the equation:

$$\tau_{avg} = \frac{A_1\tau_1 + A_2\tau_2}{A_1 + A_2}$$

**Table S2** R<sup>2</sup> value of the dark J-V characteristics of the electron-only devices.

| Samples                        | Ohmic region | TFL region | SCLC region |
|--------------------------------|--------------|------------|-------------|
| Control SnO <sub>2</sub>       | 0.9983       | 0.9997     | 0.9997      |
| PAPT-modified SnO <sub>2</sub> | 0.9999       | 0.9987     | 0.9991      |

**Table S3** The champion photovoltaic performance of PSCs with/without Phe addition

| Conditions | $J_{SC}$ (mA/cm <sup>2</sup> ) | $V_{OC}$ (V) | $FF$ (%) | PCE (%) |
|------------|--------------------------------|--------------|----------|---------|
| Control    | 25.09                          | 1.06         | 74.28    | 19.77   |
| 1 mM PAPT  | 23.96                          | 1.09         | 79.67    | 20.81   |
| 2 mM PAPT  | 25.02                          | 1.09         | 81.55    | 22.25   |
| 3 mM PAPT  | 24.97                          | 1.09         | 79.06    | 21.58   |
| 4 mM PAPT  | 24.91                          | 1.06         | 78.47    | 20.77   |

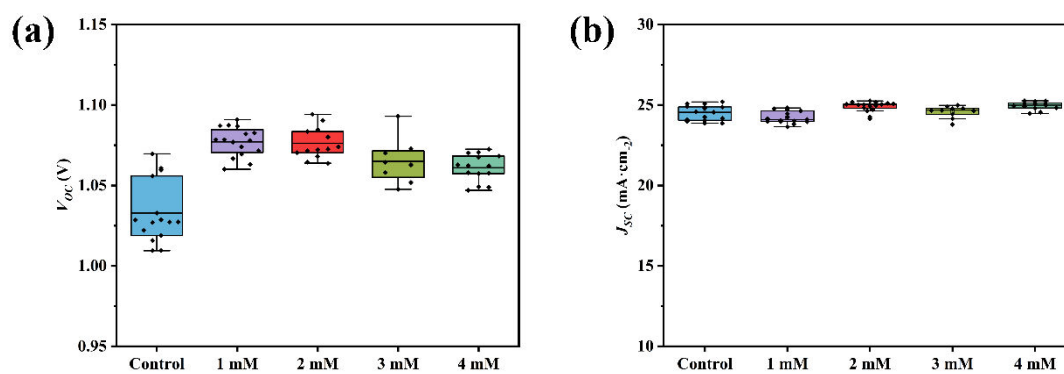

**Figure S10**  $V_{OC}$  and  $J_{SC}$  statistic distribution of PSCs with different amounts of periodic acid treatment.

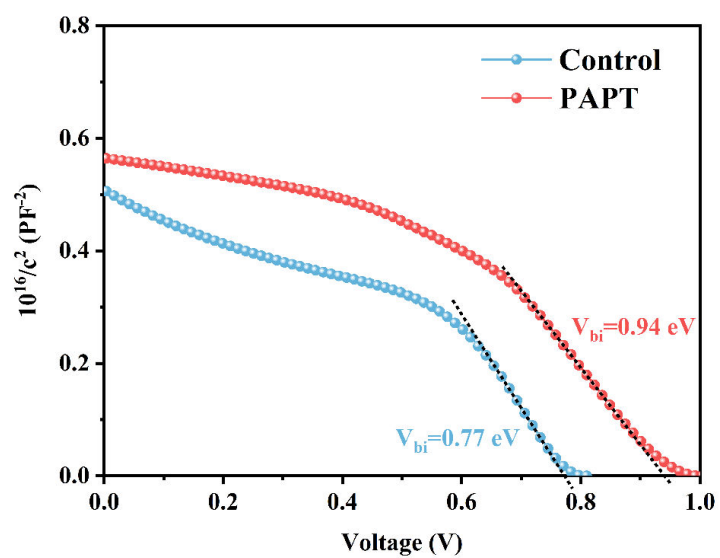

**Figure S11** Electric capacity-voltage ( $C-I$ ) measurement of the corresponding devices.

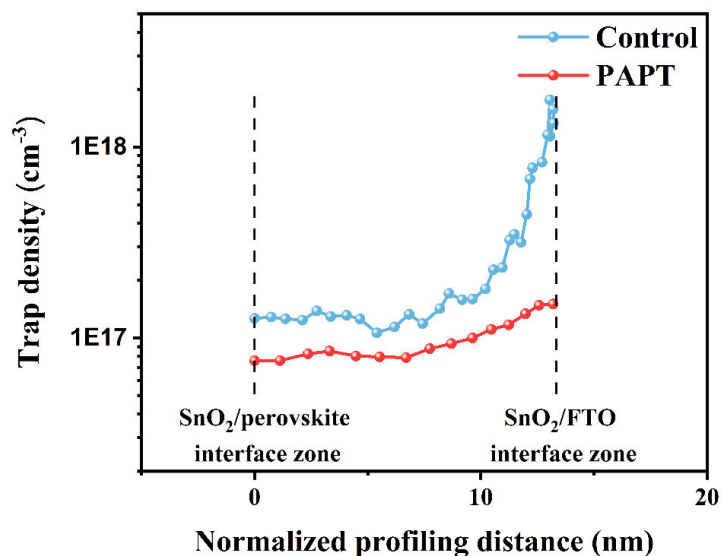

**Figure S12** DLCP measurements of corresponding devices. Note: The x-axis has been adjusted to start from the SnO<sub>2</sub>/perovskite interface.<sup>[9]</sup>

**Table S4** EIS fitting results for PSCs based on different SnO<sub>2</sub> films under dark condition.

| Samples                        | $R_s$ ( $\Omega$ ) | $R_{rec}$ ( $\Omega$ ) |
|--------------------------------|--------------------|------------------------|
| Pristine SnO <sub>2</sub>      | 29.49              | 240.6                  |
| PAPT-modified SnO <sub>2</sub> | 23.96              | 399.7                  |

## References

1. Liu, C., et al., *Tuning structural isomers of phenylenediammonium to afford efficient and stable perovskite solar cells and modules*. Nat Commun, 2021. **12**(1): p. 6394.
2. Kresse, G. and J. Furthmüller, *Efficient iterative schemes for ab initio total-energy calculations using a plane-wave basis set*. Physical Review B, 1996. **54**(16): p. 11169-11186.
3. Blöchl, P.E., *Projector augmented-wave method*. Physical Review B, 1994. **50**(24): p. 17953-17979.
4. Kresse, G. and D. Joubert, *From ultrasoft pseudopotentials to the projector augmented-wave method*. Physical Review B, 1999. **59**(3): p. 1758-1775.
5. Kresse, G. and J. Furthmüller, *Efficiency of ab-initio total energy calculations for metals and semiconductors using a plane-wave basis set*. Computational Materials Science, 1996. **6**(1): p. 15-50.

6. Ernzerhof, M. and G.E. Scuseria, *Assessment of the Perdew–Burke–Ernzerhof exchange-correlation functional*. The Journal of Chemical Physics, 1999. **110**(11): p. 5029-5036.
7. Grimme, S., et al., *A consistent and accurate ab initio parametrization of density functional dispersion correction (DFT-D) for the 94 elements H-Pu*. The Journal of Chemical Physics, 2010. **132**(15): p. 154104.
8. Murgatroyd, P., *Theory of space-charge-limited current enhanced by Frenkel effect*. Journal of Physics D: Applied Physics, 1970. **3**(2): p. 151.
9. Xiong, Q., et al., *NdCl<sub>3</sub> Dose as a Universal Approach for High-Efficiency Perovskite Solar Cells Based on Low-Temperature-Processed SnOx*. ACS Applied Materials & Interfaces, 2020. **12**(41): p. 46306-46316.
